# Supplementary material for: Ultrafast and Facile Synthesis of (Ni/Fe/Mo)OOH on Ni Foam for Oxygen Evolution Reaction in Seawater Electrolysis
Source: MDPI journal article supplement (doi:10.3390/catal13060924), 2023-05-24
Supplement: s1 [file s1]

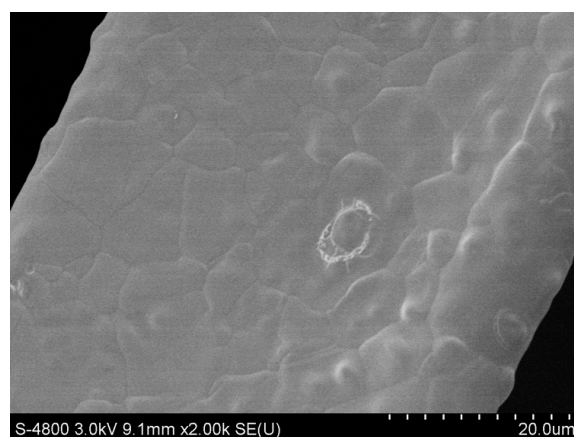

**Figure S1.** SEM images of pre-treated Ni foam

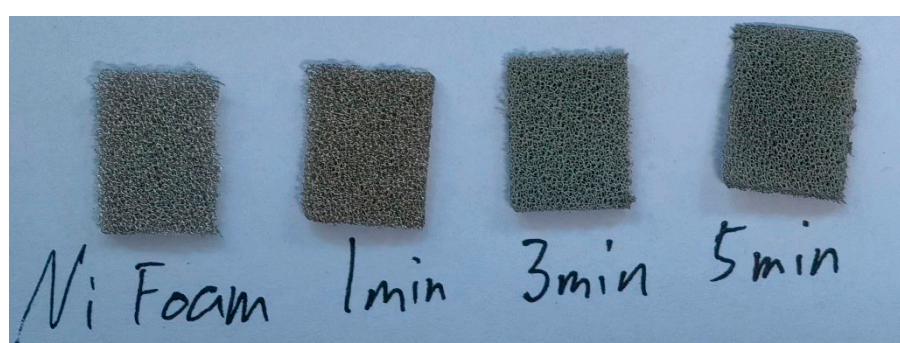

**Figure S2.** Photograph of commercial Ni foam and (Ni/Fe/Mo)OOH electrodes prepared under different reaction times.

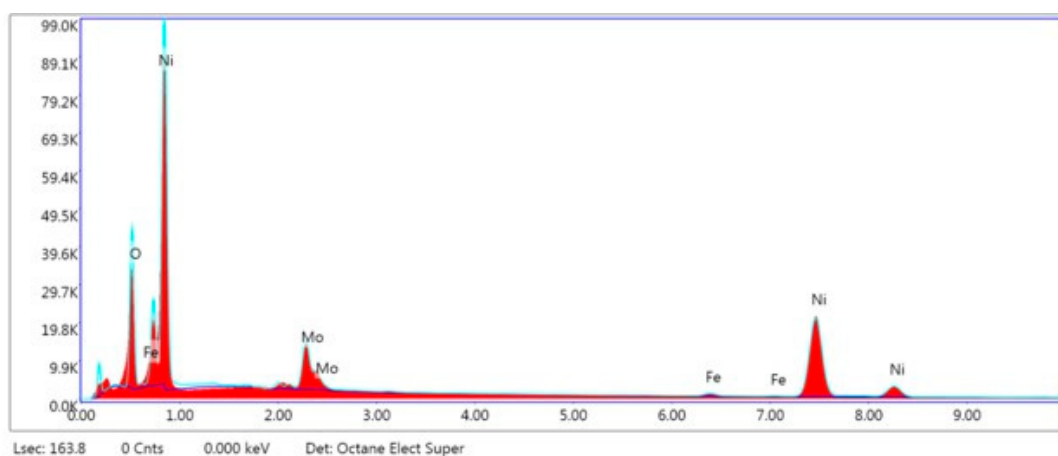

**Figure S3.** The EDS spectrum of (Ni/Fe/Mo)OOH using SEM

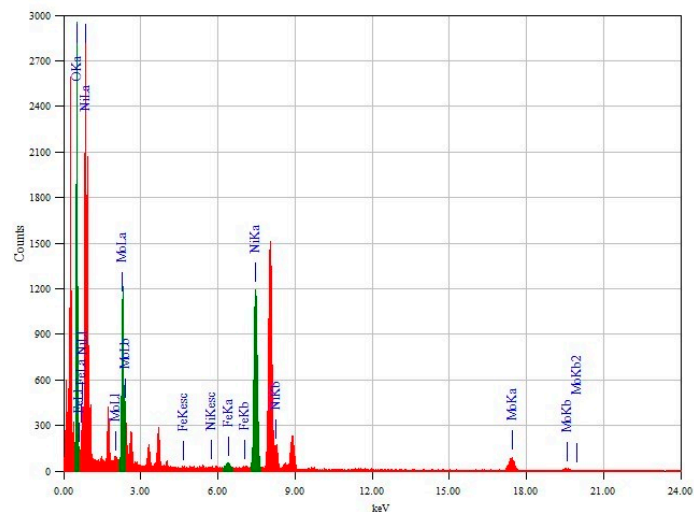

**Figure S4.** The EDS spectrum of (Ni/Fe/Mo)OOH using TEM

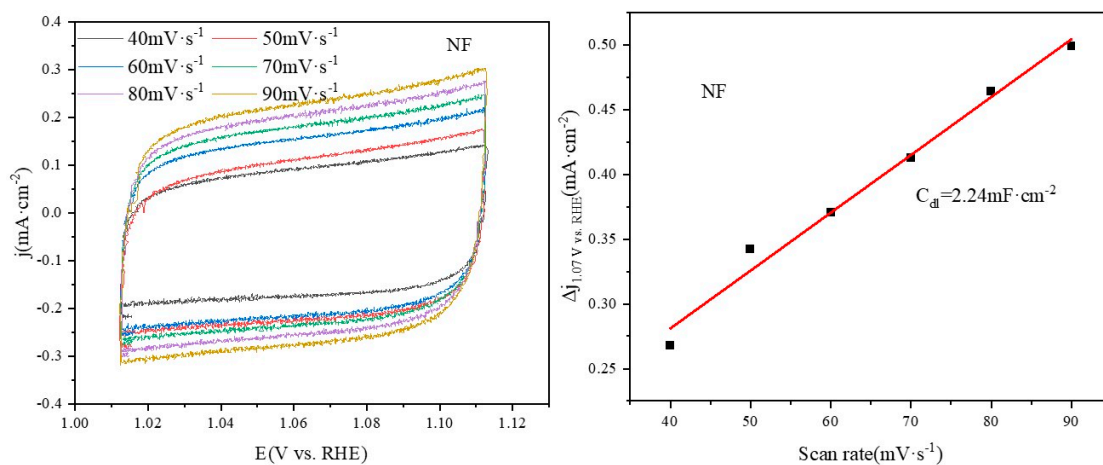

**Figure S5.** CV curves of Ni foam, calculation of  $C_{dl}$  involves plotting capacitive current density against scan rate and fitting a linear regression to the resulting plot

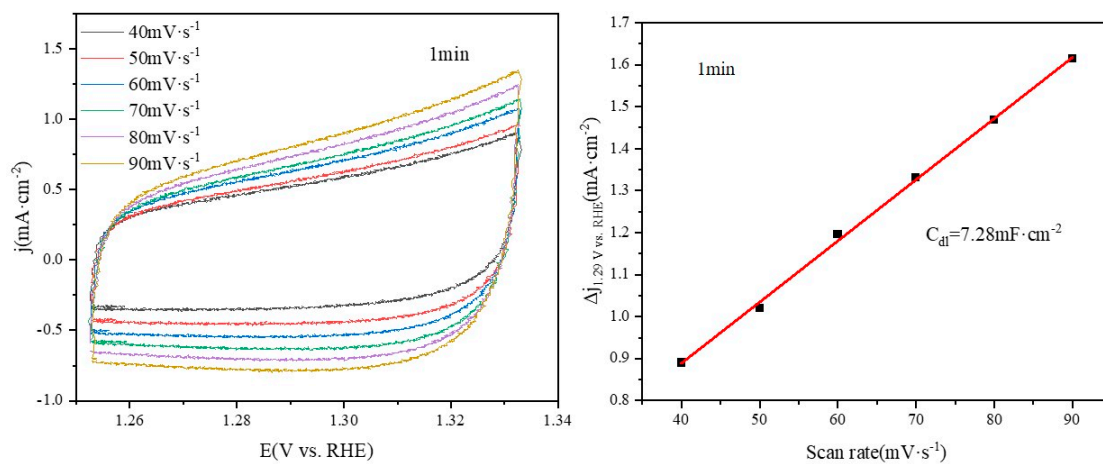

**Figure S6.** CV curves of (Ni/Fe/Mo)OOH (reaction time: 1 min), calculation of  $C_{dl}$  involves plotting

capacitive current density against scan rate and fitting a linear regression to the resulting plot

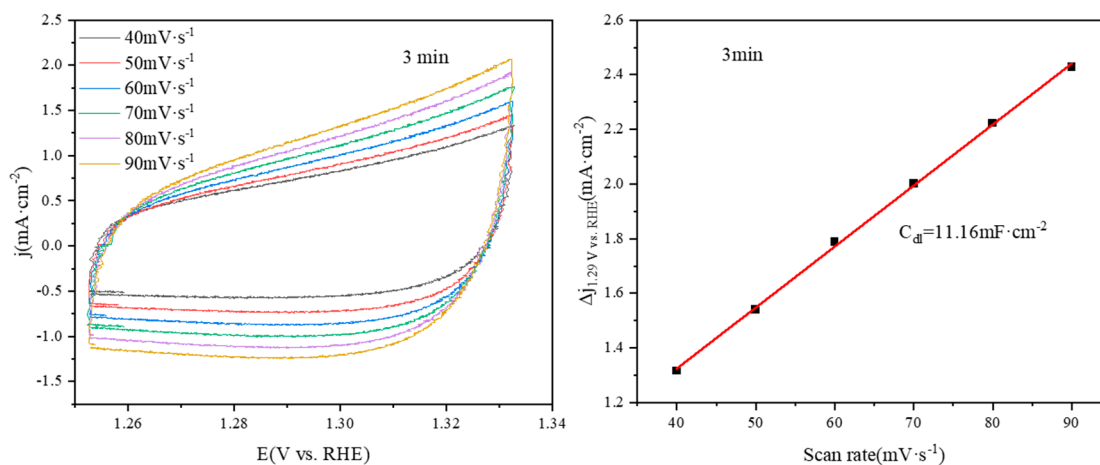

**Figure S7.** CV curves of (Ni/Fe/Mo)OOH (reaction time: 3 min), calculation of  $C_{dl}$  involves plotting

capacitive current density against scan rate and fitting a linear regression to the resulting plot

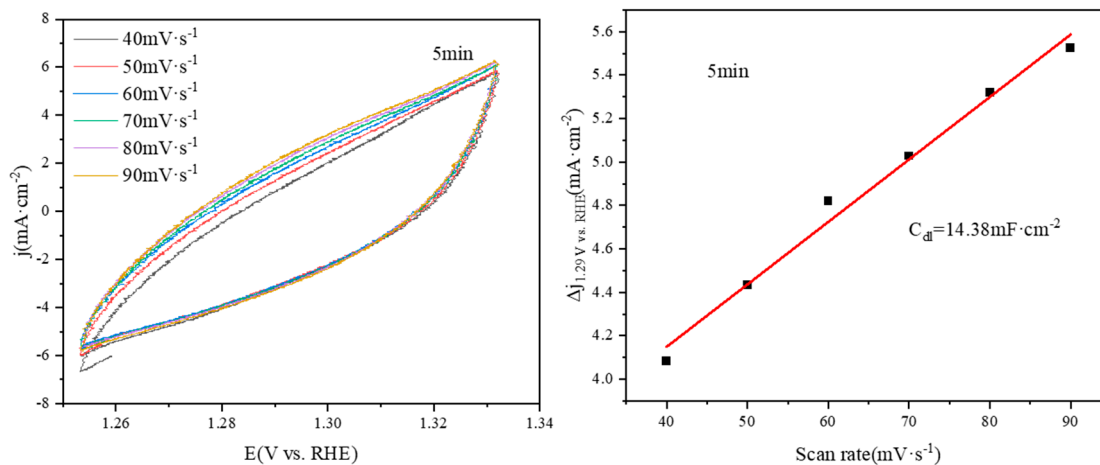

**Figure S8.** CV curves of (Ni/Fe/Mo)OOH (reaction time: 5 min), calculation of  $C_{dl}$  involves plotting

capacitive current density against scan rate and fitting a linear regression to the resulting plot

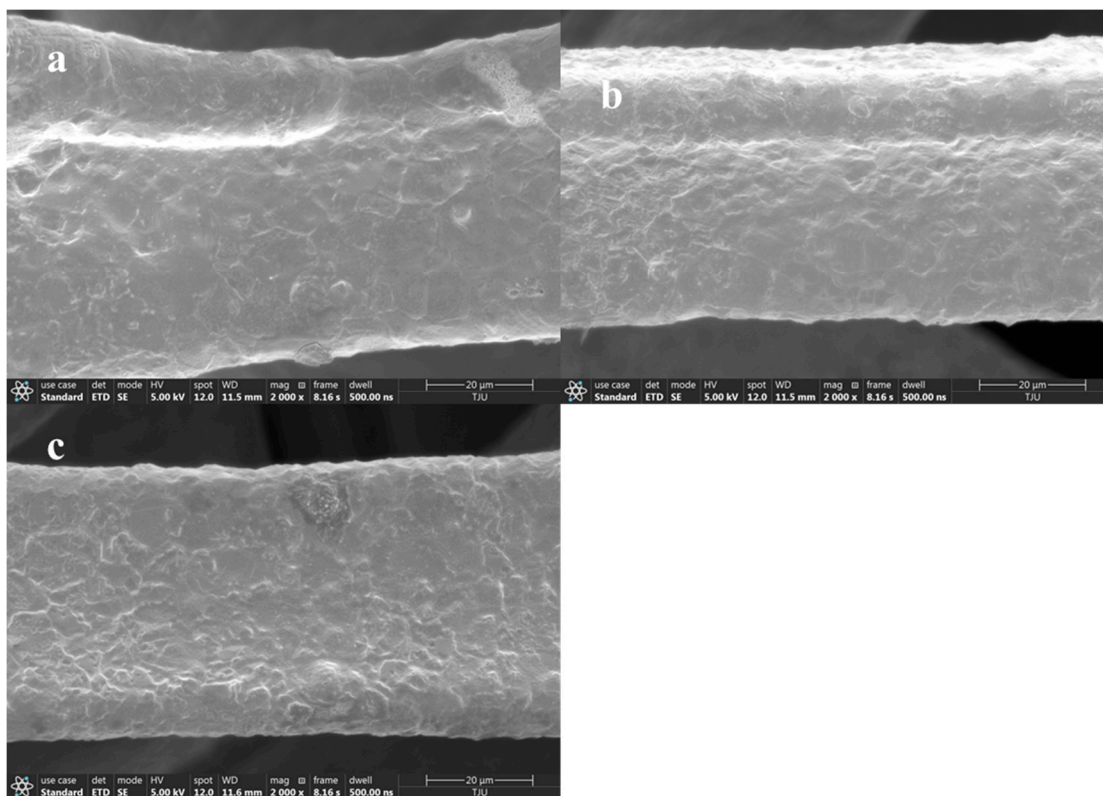

**Figure S9.** SEM images of (Ni/Fe)OOH at different immersing time, (a) 1 min, (b) 3 min, (c) 5 min

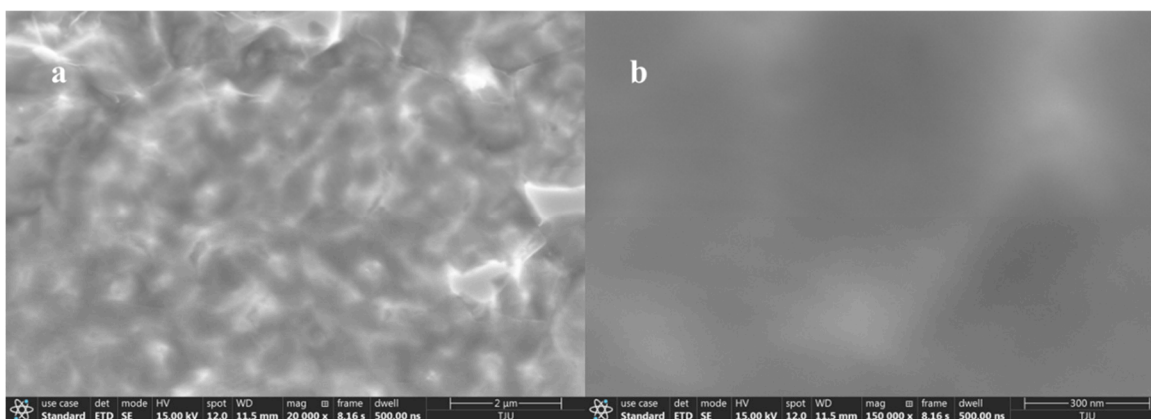

**Figure S10.** HR-SEM images of (Ni/Fe)OOH (5 min).

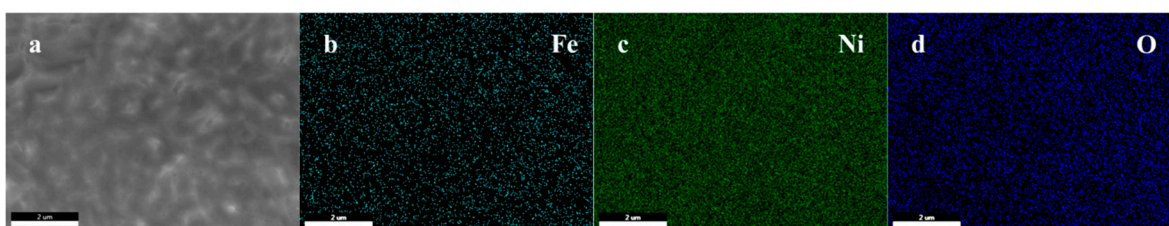

**Figure S11.** EDS mapping images of the (Ni/Fe)OOH sample with the immersing time of 5 min



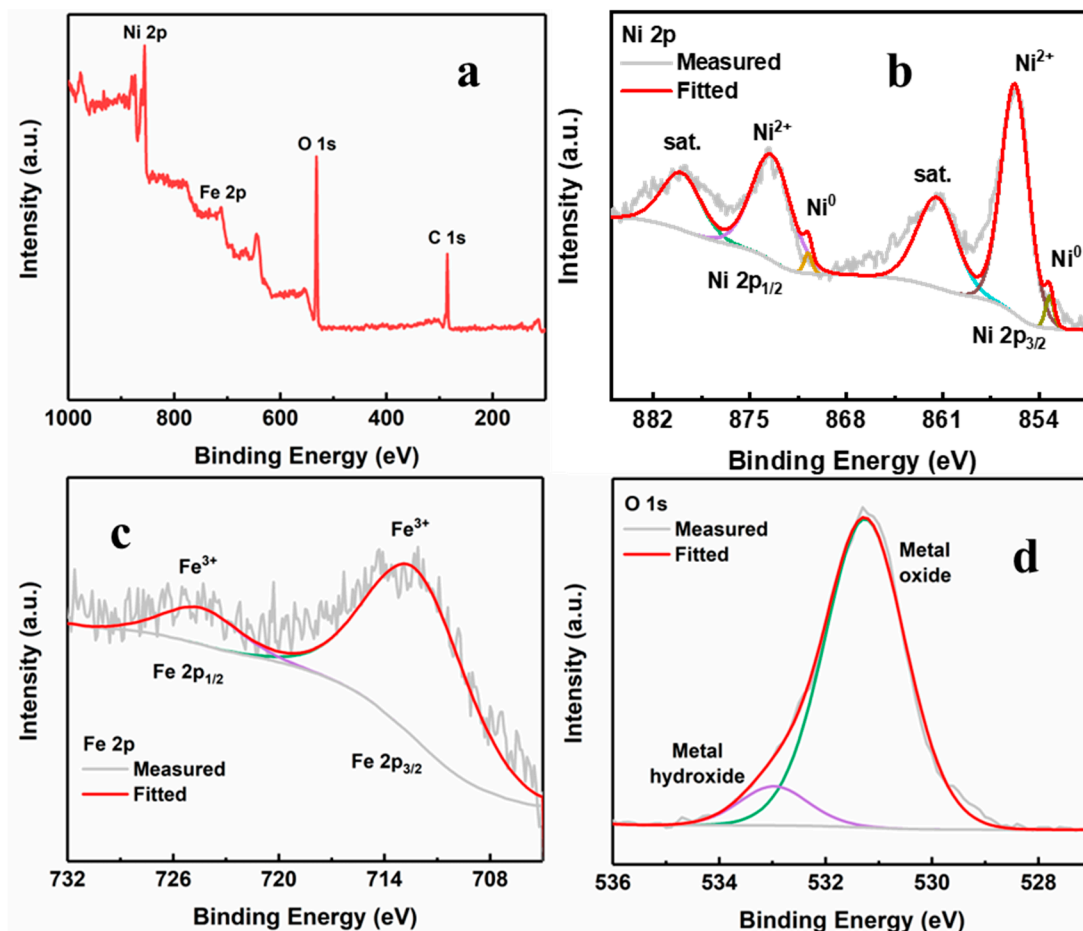

**Figure S12.** XPS spectra for (Ni/Fe)OOH (5 min): (a) Survey, (b) Ni 2p, (c) Fe 2p, (d) O 1s

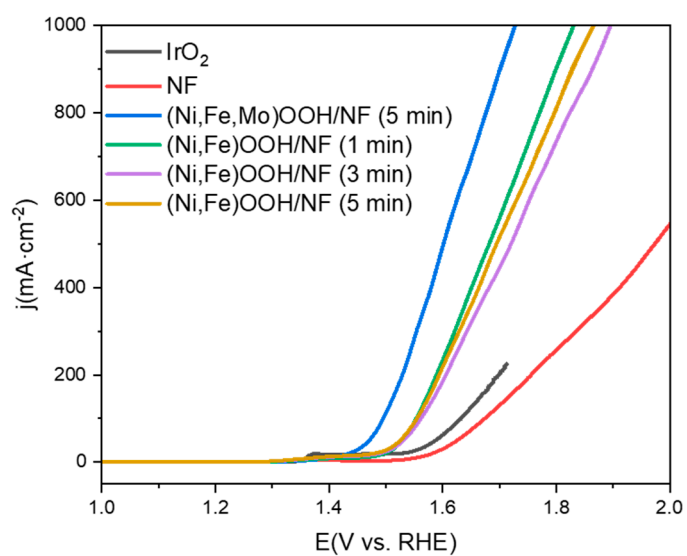

**Figure S13.** Polarization curves of Ni foam, IrO<sub>2</sub>, (Ni/Fe/Mo)OOH and (Ni/Fe)OOH electrodes.

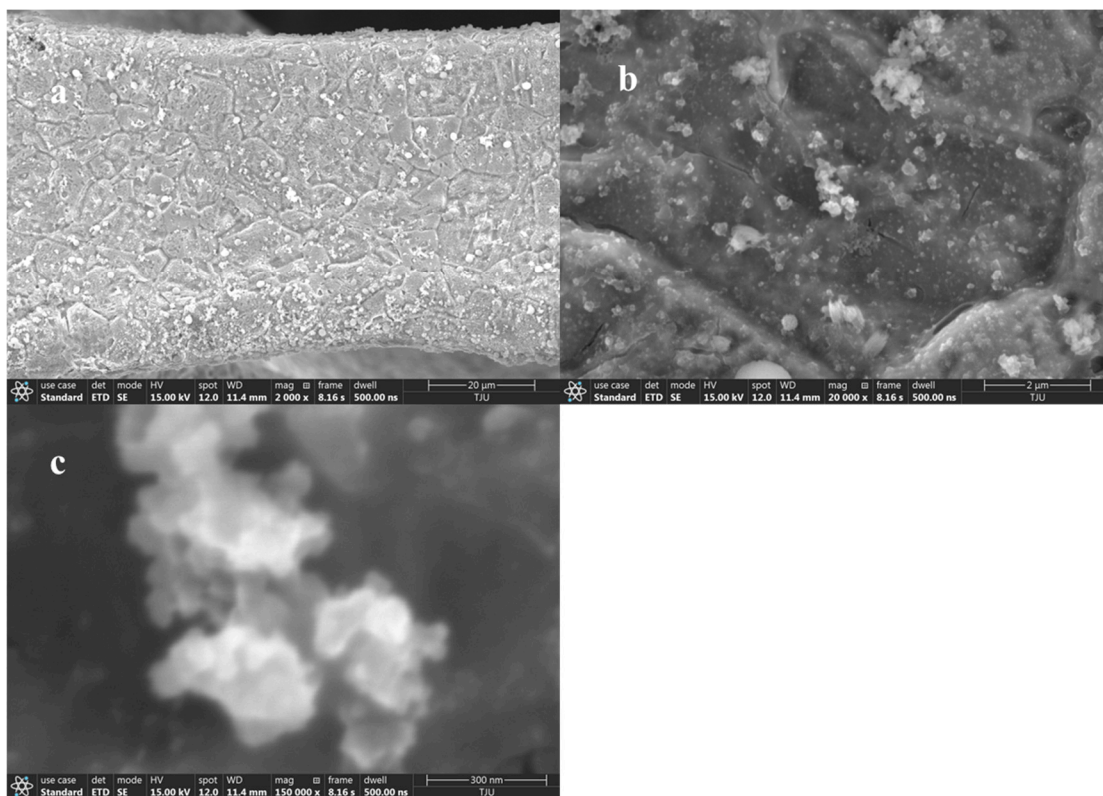

**Figure S14.** SEM image of (Ni/Fe/Mo)OOH catalyst after 72h of hydrogen production at a current density of  $100 \text{ mA} \cdot \text{cm}^{-2}$  in 1 M KOH electrolyte

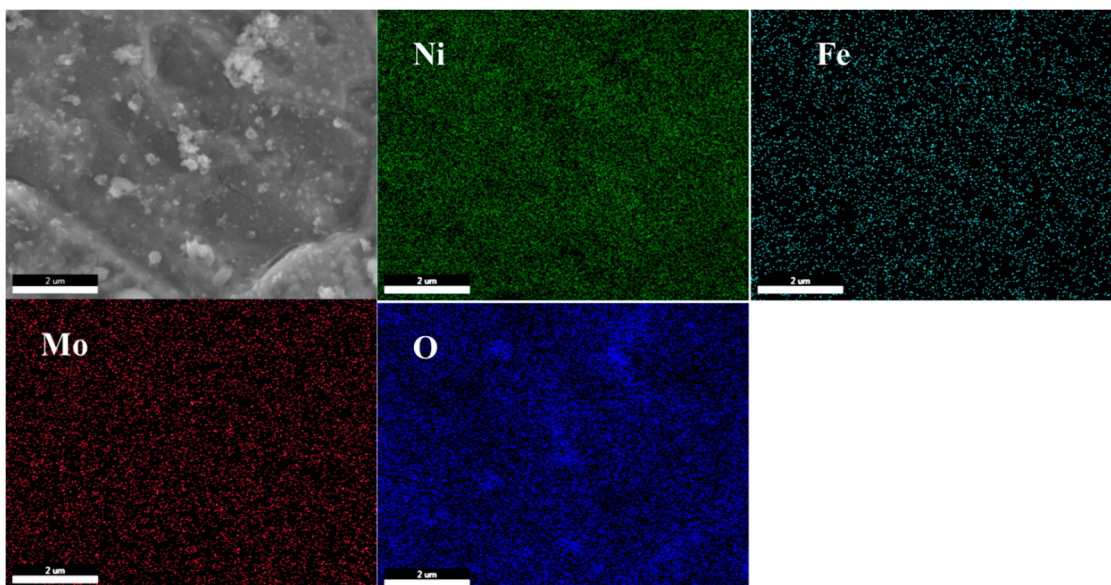

**Figure S15.** EDS mapping images of the (Ni/Fe/Mo)OOH sample after 72h of hydrogen production at a current density of  $100 \text{ mA} \cdot \text{cm}^{-2}$  in 1 M KOH electrolyte

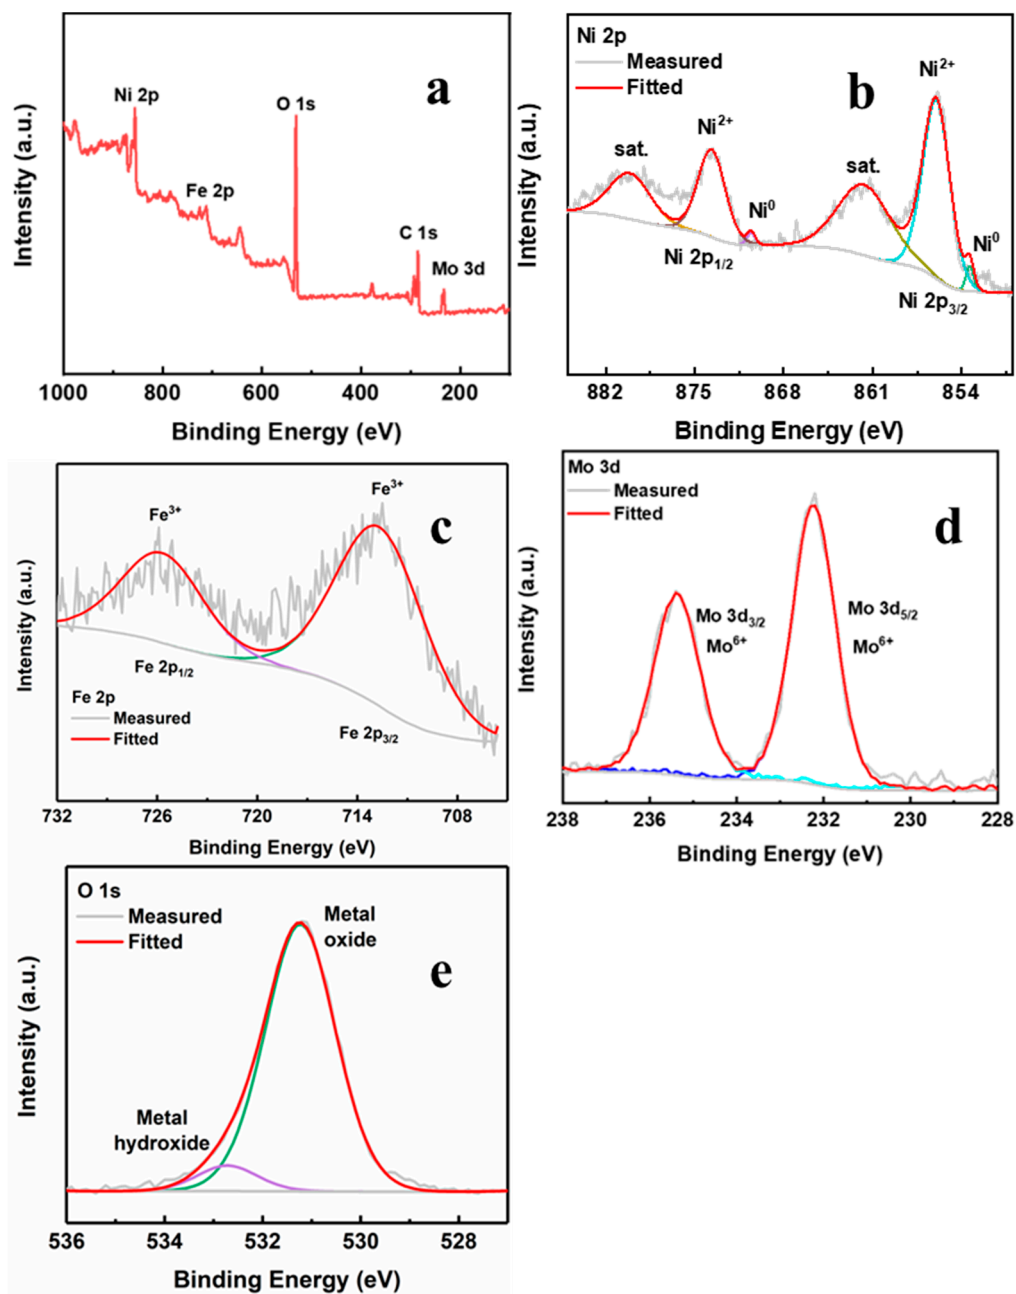

**Figure S16.** XPS spectra for (Ni/Fe/Mo)OOH after 72h of hydrogen production at a current density of

100 mA·cm<sup>-2</sup> in 1 M KOH electrolyte: (a) Survey, (b) Ni 2p, (c) Fe 2p, (d) Mo 3d, (e) O 1s

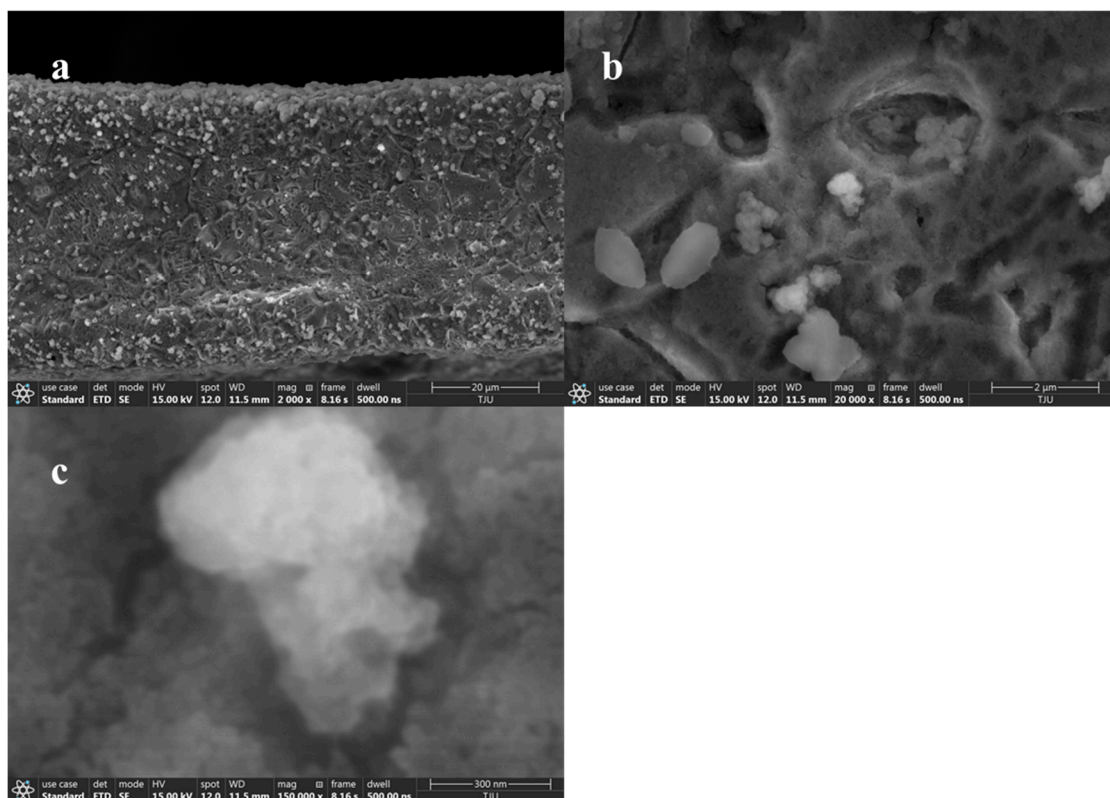

**Figure S17.** SEM image of (Ni,Fe,Mo)OOH catalyst after 72h of hydrogen production at a current density of  $100 \text{ mA} \cdot \text{cm}^{-2}$  in alkaline natural seawater electrolyte

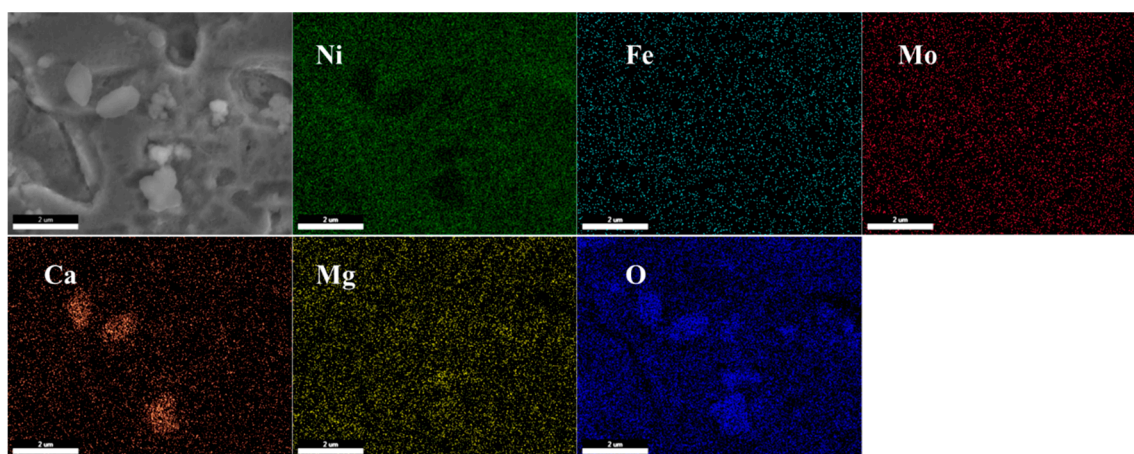

**Figure S18.** EDS mapping images of the (Ni/Fe/Mo)OOH sample after 72h of hydrogen production at a current density of  $100 \text{ mA} \cdot \text{cm}^{-2}$  in alkaline natural seawater electrolyte
